# Supplementary material
Source: PubMed Central journal article supplement (PMC4157913)
Supplement: NIHMS622360-supplement-supplement_1.pdf [file NIHMS622360-supplement-supplement_1.pdf]

## SUPPLEMENTAL MATERIAL

**Supplemental Table I: THRIVE Score and risk of Symptomatic ICH**

|                     | <b>THRIVE 0-2</b> | <b>THRIVE 3-5</b> | <b>THRIVE 6-9</b> | <b>P value</b> |
|---------------------|-------------------|-------------------|-------------------|----------------|
| <b>sICH - All</b>   | 0% (0/15)         | 6.5% (6/92)       | 8.8% (6/68)       | 0.67           |
| <b>sICH - Trevo</b> | 0% (0/8)          | 6.5% (3/46)       | 6.3% (2/32)       | 1.00           |
| <b>sICH - Merci</b> | 0% (0/7)          | 6.5% (3/46)       | 11.1% (4/36)      | 0.83           |

P values are from the extended Fisher's exact test (Fisher-Freeman-Halton test).
